# Supplementary material
Source: Springer Nature journal article supplement (https://www.springermedizin.de/resource/supplementary/12911_2013_880_MOESM5_ESM.pdf/9526630)
Supplement: MOESM5 [file 9526630]

|                         |              |                    |            |                 |             |               |                |           |                                  |           |                  |
|-------------------------|--------------|--------------------|------------|-----------------|-------------|---------------|----------------|-----------|----------------------------------|-----------|------------------|
| <i>Patient feature</i>  | <i>age</i>   |                    |            |                 | <i>sex</i>  |               | <i>smoking</i> |           | <i>has heart events recently</i> |           |                  |
| <i>Linguistic label</i> | <i>young</i> | <i>middle-aged</i> | <i>old</i> | <i>very old</i> | <i>male</i> | <i>female</i> | <i>yes</i>     | <i>no</i> | <i>yes</i>                       | <i>no</i> |                  |
| <i>rule</i>             | 0            | 0                  | 1          | 1               | 0           | 0             | 1              | 0         | 1                                | 0         | <i>High-risk</i> |
